# Supplementary material
Source: MDPI journal article supplement (https://www.mdpi.com/2071-1050/13/16/8786)

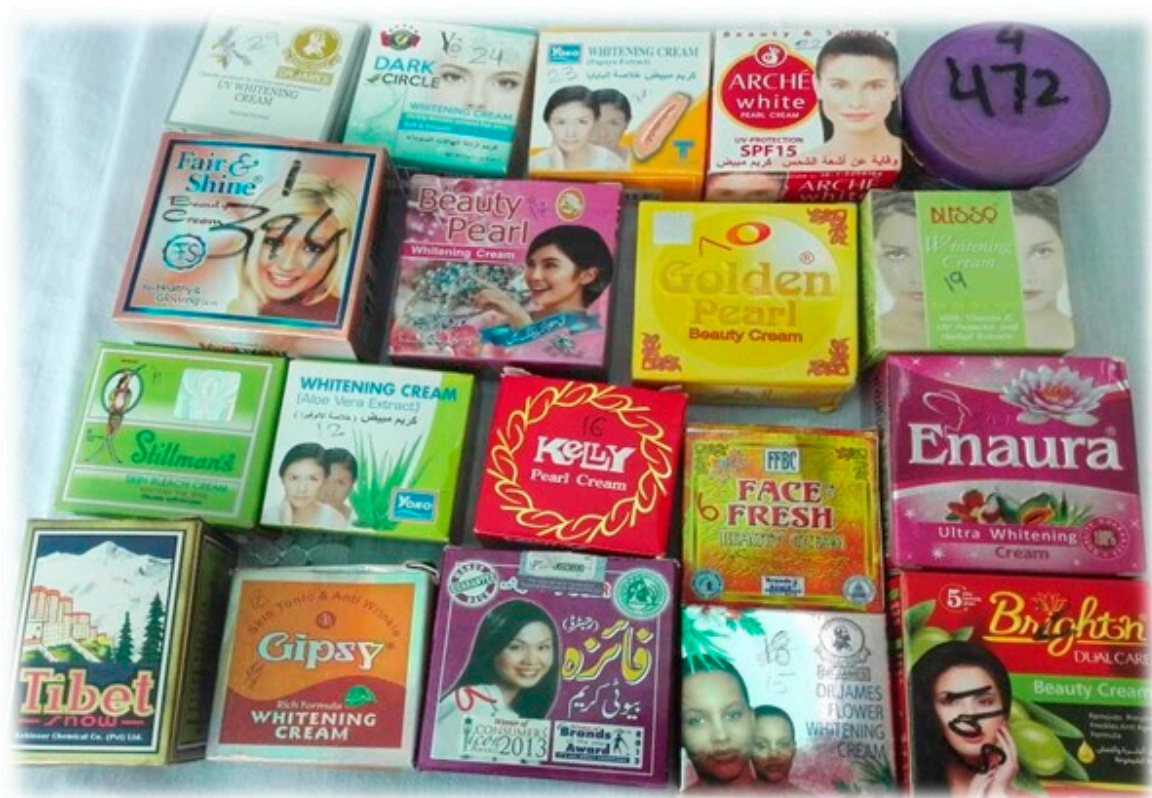

**Figure S1:** Photographs of skin whitening creams used in the current study.

Supplement: s1 [file s1]
